# Supplementary material for: Water flow in carbon nanotubes: the role of tube chirality
Source: Royal Society of Chemistry journal article supplement (doi:10.1039/c9cp00429g), 2019-01-01
Supplement: c9cp00429g1.pdf [file c9cp00429g1.pdf]

# Water flow in carbon nanotubes: The role of tube chirality

Alan Sam<sup>1</sup>, Vishnu Prasad K<sup>1</sup>, and Sarith P. Sathian\*<sup>1</sup>

<sup>1</sup>Department of Applied Mechanics, Indian Institute of Technology Madras,  
Chennai, India.

## 1 Simulation details

In classical molecular dynamics (MD) motion of the atoms are described by Newtonian equations of motion. The equation of motion of a particle  $i$  with mass  $m$  and position  $r$  acted upon by a net force  $F$  is given by:

$$m_i \frac{d^2 \mathbf{r}_i}{dt^2} = F_i(t) \quad (1)$$

where  $F_i$  can be expressed as the gradient of the potential energy ( $U$ ):

$$F_i(r_1, r_2, \dots, r_N) = -\nabla U(r_1, r_2, \dots, r_N) \quad (2)$$

The potential energy consists of bonded  $U(\vec{r})$  and non-bonded  $U(r_{ij})$  interactions. In our study, we used the harmonic potentials for the bond stretching and angle bending interactions.

$$U(\vec{r}) = \sum_{\text{bond}} \frac{k_{\text{bond}}}{2} (r - r_0)^2 + \sum_{\text{angle}} \frac{k_{\text{angle}}}{2} (\theta - \theta_0)^2 \quad (3)$$

where  $k_{\text{bond}}$  and  $k_{\text{angle}}$  are the coefficients of the harmonic potentials of the bond stretching and angle bending, respectively.  $r_0$  and  $\theta_0$  represents the reference bond length and angle. Non-bonded terms include van der Waals (vdW) and electrostatic interactions, which were modeled using 12-6 Lennard-Jones (LJ) and coulombic potentials, respectively.

---

\*Corresponding Author: sarith@iitm.ac.in

**Table S1:** Interaction parameters used for the study.

| Parameter                  | Value   |
|----------------------------|---------|
| $l_{OH}$ (nm)              | 0.1     |
| $\theta_{OH}$              | 109.47  |
| $q_H(e)$                   | 0.4238  |
| $q_O(e)$                   | -0.8476 |
| $\sigma_{OO}$ (nm)         | 0.3166  |
| $\epsilon_{OO}$ (kcal/mol) | 0.15535 |
| $\sigma_{CO}$ (nm)         | 0.3190  |
| $\epsilon_{CO}$ (kcal/mol) | 0.09369 |

$$U(r_{ij}) = \sum_{i=1}^N \sum_{j=i+1}^N \left( 4\epsilon_{ij} \left[ \left( \frac{\sigma}{r} \right)^{12} - \left( \frac{\sigma}{r} \right)^6 \right] + \frac{q_i q_j}{4\pi\epsilon_0 r_{ij}} \right) \quad (4)$$

We performed MD simulations using the LAMMPS software package. [1] Carbon-carbon interactions are modeled with the reactive empirical bond order (REBO) potential [2], which has been widely used to study graphene and CNTs. SPC/E model was used for water molecules, whose bulk property predictions agree well with experiments [3]. Fluid-wall Lennard-Jones interaction parameters were taken from Werder *et al.* [4], and the interactions were truncated at a distance of 1 nm. Long range electrostatic interactions were handled by the Wolf method, [5, 6] using a 1 nm cutoff and a damping parameter of  $2.25 \text{ nm}^{-1}$ . The parameters for the interaction potentials are given in TABLE I.

Simulations were performed in the NVT ensemble at 300 K temperature. We coupled the Nosé-Hoover thermostat to the CNT walls to maintain the average system temperature. The Nosé-Hoover thermostat modulates the kinetic temperature by coupling the system to a “fictitious” heat bath ( $\eta$ ) of mass  $Q$ . The average system temperature approaches the target value by scaling the velocities of each particle by a factor  $P_\eta$ . The equation of motion of a particle can be written as:

$$\frac{d^2 \mathbf{r}_i}{dt^2} = \frac{\mathbf{F}_i(\mathbf{r}_i)}{m_i} - \frac{P_\eta}{Q} \frac{d\mathbf{r}_i}{dt} \quad (5)$$

The net momentum of the CNT was set to zero at each time step to avoid drifting of the CNT due to the force imparted by the water.

## References

- [1] Steve Plimpton. Fast parallel algorithms for short-range molecular dynamics. *Journal of computational physics*, 117(1):1–19, 1995.
- [2] Donald W Brenner, Olga A Shenderova, Judith A Harrison, Steven J Stuart, Boris Ni, and

- Susan B Sinnott. A second-generation reactive empirical bond order (rebo) potential energy expression for hydrocarbons. *Journal of Physics: Condensed Matter*, 14(4):783, 2002.
- [3] Pekka Mark and Lennart Nilsson. Structure and dynamics of the tip3p, spc, and spc/e water models at 298 k. *The Journal of Physical Chemistry A*, 105(43):9954–9960, 2001.
  - [4] T Werder, JH Walther, RL Jaffe, T Halicioglu, and P Koumoutsakos. On the water-carbon interaction for use in molecular dynamics simulations of graphite and carbon nanotubes. *The Journal of Physical Chemistry B*, 107(6):1345–1352, 2003.
  - [5] D Wolf, P Keblinski, SR Phillpot, and J Eggebrecht. Exact method for the simulation of coulombic systems by spherically truncated, pairwise r<sup>-1</sup> summation. *The Journal of Chemical Physics*, 110(17):8254–8282, 1999.
  - [6] Christopher J Fennell and J Daniel Gezelter. Is the ewald summation still necessary? pairwise alternatives to the accepted standard for long-range electrostatics. *The Journal of Chemical Physics*, 124(23):234104, 2006.
